# Supplementary material
Source: PubMed Central journal article supplement (PMC5946734)
Supplement: Supp_Table1.pdf [file Supp_Table1.pdf]

**S1 Table. Primers used in detection of aminoglycoside-modifying enzymes (AME) and expected amplicon sizes**

| Gene               | Resistance phenotype |                     | DNA sequence 5'-3'       | Product (pb) | GenBank accession | Reference |
|--------------------|----------------------|---------------------|--------------------------|--------------|-------------------|-----------|
| <i>aac(6')-Ib</i>  | Ak,K,Nt,To           | <i>aac6'-Ib F</i>   | TTGCGATGCTCTATGAGTGGCTA  | 482          | M21682            | [1]       |
|                    |                      | <i>aac6'-Ib R</i>   | CTCGAATGCCTGGCGTGTTT     |              |                   |           |
| <i>aac(3)-IIa</i>  | Gm,Nt,To             | <i>aac3-IIa F</i>   | GGCAATAACGGAGGCGCTTCAAAA | 563          | X13543            | [1]       |
|                    |                      | <i>aac3-IIa R</i>   | TTCCAGGCATCGGCATCTCATACG |              |                   |           |
| <i>aac(3)-Ia</i>   | Gm                   | <i>aac3-Ia F</i>    | GCAGTCGCCCTAAAACAAA      | 464          | X15852            | [1]       |
|                    |                      | <i>aac3-Ia R</i>    | CACTTCTCCCGTATGCCCAACTT  |              |                   |           |
| <i>aac(3)-IVa</i>  | Ap,Gm,Nt,To          | <i>aac3-IVa F</i>   | TCGGTCAGCTTCTCAACCTT     | 314          | X01385            | [1]       |
|                    |                      | <i>aac3-IVa R</i>   | GATGATCTGCTCTGCCTGTG     |              |                   |           |
| <i>ant(2'')-Ia</i> | Gm,K,To              | <i>ant2'' -Ia F</i> | ACGCCGTGGGTCGATGTTTGATGT | 572          | X04555            | [1]       |
|                    |                      | <i>ant2'' -Ia R</i> | CTTTTCCGCCCCGAGTGAGGTG   |              |                   |           |
| <i>ant(4')-IIa</i> | Ak,K,To              | <i>ant4'-IIa F</i>  | CCGGGGCGAGGCGAGTGC       | 423          | M98270            | [1]       |
|                    |                      | <i>ant4'-IIa R</i>  | TACGTGGGCGGATTGATGGGAACC |              |                   |           |
| <i>aph(3')-Ia</i>  | K,Nm                 | <i>aph3'-Ia F</i>   | CGAGCATCAAATGAAACTGC     | 624          | V00359            | [1]       |
|                    |                      | <i>aph3'-Ia R</i>   | GCGTTGCCAATGATGTTACAG    |              |                   |           |
| <i>aph(3')-IIa</i> | K,Nm                 | <i>aph3'-IIa F</i>  | GAACAAGATGGATTGCACGC     | 680          | V00618            | [2]       |
|                    |                      | <i>aph3'-IIa R</i>  | GCTCTTCAGCAATATCACGG     |              |                   |           |
| <i>armA</i>        | Ak,Ab,Gm,K,Nt,To     | <i>armA-F</i>       | CAAATGGATAAGAATGATGTT    | 777          | AF550415          | [3]       |
|                    |                      | <i>armA-R</i>       | TTATTTCTGAAATCCACT       |              |                   |           |
| <i>rmtB</i>        | Ak,Ab,Gm,K,Nt,To     | <i>rmtB-F</i>       | TCAACGATGCCCTCACCTC      | 459          | AB103506          | [4]       |
|                    |                      | <i>rmtB-R</i>       | GCAGGGCAAAGGTAATAATCC    |              |                   |           |
| <i>rmtC</i>        | Ak,Ab,Gm,K,Nt,To     | <i>rmtC-F</i>       | CGAAGAAGTAACAGCCAAAG     | 711          | AB194779          | [5]       |

Ak, amikacin; Ap, apramycin; Ab, arbekacin; Gm, gentamicin; K, kanamycin; Nm, neomycin; Nt, netilmicin; To, tobramycin.

## References

- [1] Fernández-Martínez M, Miro E, Ortega A, Bou G, González-Lopez JJ, Oliver A, et al. Molecular identification of aminoglycoside-modifying enzymes in clinical isolates of *Escherichia coli* resistant to amoxicillin/clavulanic acid isolated in Spain. *Int J Antimicrob Agents* 2015;46:157-163.
- [2] Maynard C, Bekal S, Sanschagrin F, Levesque RC, Brousseau R, Masson L, et al. Heterogeneity among Virulence and Antimicrobial Resistance Gene Profiles of Extraintestinal *Escherichia coli* Isolates of Animal and Human Origin. *J Clin Microbiol* 2004;42:5444–5452.
- [3] Galimand M, Courvalin P, Lambert T. Plasmid-mediated high-level resistance to aminoglycosides in Enterobacteriaceae due to 16S rRNA methylation. *Antimicrob Agents Chemother* 2003; 47:2565-2571.
- [4] Fritsche TR, Castanheira M, Miller GH, Jones RN, Armstrong ES. Detection of methyltransferases conferring high-level resistance to aminoglycosides in *Enterobacteriaceae* from Europe, North America, and Latin America. *Antimicrob Agents Chemother* 2008; 52:1843-1845.
- [5] Doi Y, Arakawa Y. 16S ribosomal RNA methylation: emerging resistance mechanism against aminoglycosides. *Clin Infect Dis* 2007; 45:88-94
