# Supplementary material
Source: PubMed Central journal article supplement (PMC5946734)
Supplement: Supp_Table3.pdf [file Supp_Table3.pdf]

**S3Table. ESBL genes identified in strains harboring AME-genes collected in 2000 and 2006.**

| ESBLs detected  | Ec-ESBL<br>collected in<br>2000 | Ec-ESBL<br>collected in<br>2006 | Kp-ESBL<br>collected in<br>2000 | Kp-ESBL<br>collected in<br>2006 |
|-----------------|---------------------------------|---------------------------------|---------------------------------|---------------------------------|
| SHV-2           | 2                               | 1                               | 9                               | 2                               |
| SHV-5           |                                 |                                 | 4                               | 1                               |
| SHV-12          | 28                              | 14                              | 3                               | 5                               |
| SHV-54          |                                 |                                 | 1                               |                                 |
| TEM-3           | 8                               |                                 | 11                              | 1                               |
| TEM-4           | 1                               |                                 | 11                              | 1                               |
| TEM-15          |                                 |                                 |                                 | 1                               |
| TEM-20          | 1                               |                                 |                                 |                                 |
| TEM-24          | 1                               |                                 |                                 |                                 |
| TEM-25          |                                 |                                 | 2                               |                                 |
| TEM-26          | 1                               |                                 |                                 |                                 |
| TEM-28          | 2                               |                                 |                                 |                                 |
| TEM-29          | 1                               |                                 |                                 |                                 |
| TEM-52          | 2                               |                                 |                                 | 1                               |
| TEM-133         |                                 |                                 | 12                              |                                 |
| CTXM-1          |                                 | 1                               |                                 | 6                               |
| CTXM-9          | 15                              | 4                               |                                 | 1                               |
| CTXM-10         | 1                               |                                 |                                 |                                 |
| CTXM-14         | 6                               | 28                              |                                 | 2                               |
| CTXM-15         |                                 | 32                              |                                 | 27                              |
| CTXM-32         |                                 | 1                               |                                 |                                 |
| CTXM-57         |                                 | 1                               |                                 |                                 |
| CTXM-1, SHV-12  |                                 |                                 |                                 | 3                               |
| CTXM-2, SHV-12  | 1                               |                                 |                                 |                                 |
| CTXM-9, SHV-12  |                                 | 3                               |                                 |                                 |
| CTXM-14, SHV-12 | 1                               | 1                               |                                 | 1                               |
| CTXM-14, TEM-52 |                                 |                                 |                                 | 1                               |
| CTXM-15, SHV-12 |                                 |                                 |                                 | 1                               |
| CTXM-15, TEM-74 |                                 |                                 |                                 | 1                               |
| No identified   | 4                               |                                 | 6                               | 1                               |
| TOTAL           | 75                              | 86                              | 59                              | 56                              |
